# Supplementary material for: Structural and Cognitive Aspects of Social Capital and All-Cause Mortality: A Meta-Analysis of Cohort Studies
Source: Springer Nature journal article supplement (doi:10.1007/s11205-013-0288-9), 2013-03-20
Supplement: MOESM4 [file 5755768]

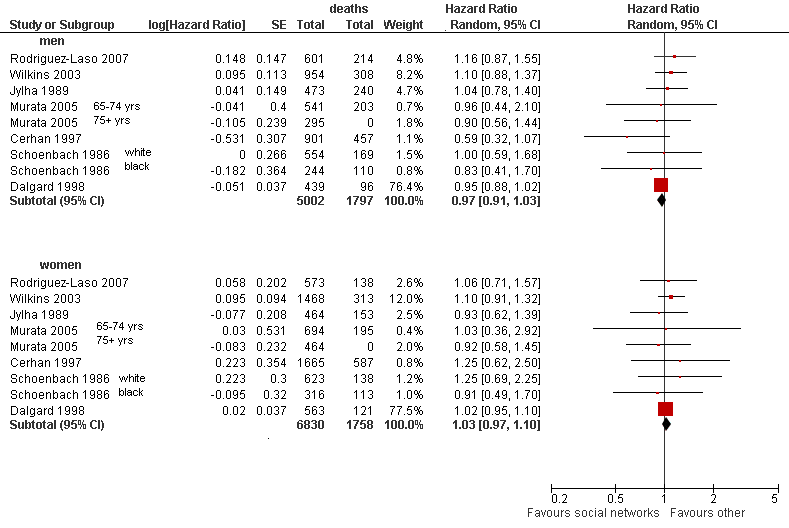


**Fig. IV** Meta-analysis of 9 data sets analyzing the association between social networks and all-cause mortality, by gender (SE=Standard Error, CI=Confidence Interval). Number of deaths was not reported by age in Murata et al. (2005)
