# Supplementary material for: Structural and Cognitive Aspects of Social Capital and All-Cause Mortality: A Meta-Analysis of Cohort Studies
Source: Springer Nature journal article supplement (doi:10.1007/s11205-013-0288-9), 2013-03-20
Supplement: MOESM8 [file 5755768]

**
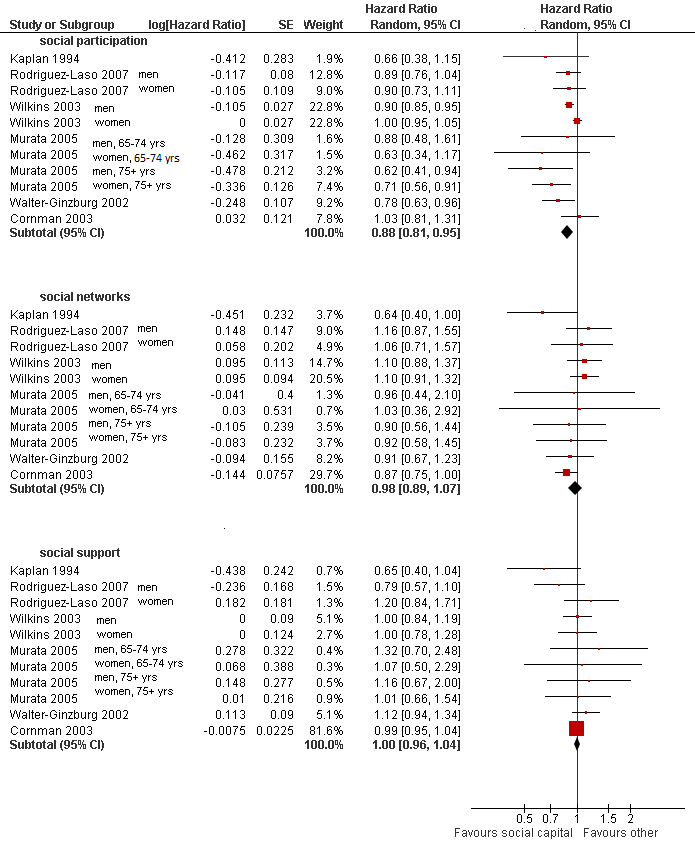
**

**Figure VIII** Meta-analysis of 11 data sets analyzing the association between three domains of social capital (social participation, social networks, social support) and all-cause mortality (SE=Standard Error, CI=Confidence Interval). Number of deaths was not reported by age in Murata et al. (2005)
